# Supplementary material
Source: Springer Nature journal article supplement (https://www.springermedizin.de/resource/supplementary/12885_2009_1743_MOESM2_ESM.pdf/9472818)

## Dendrogram for clustering experiments, using centered correlation and average linkage.

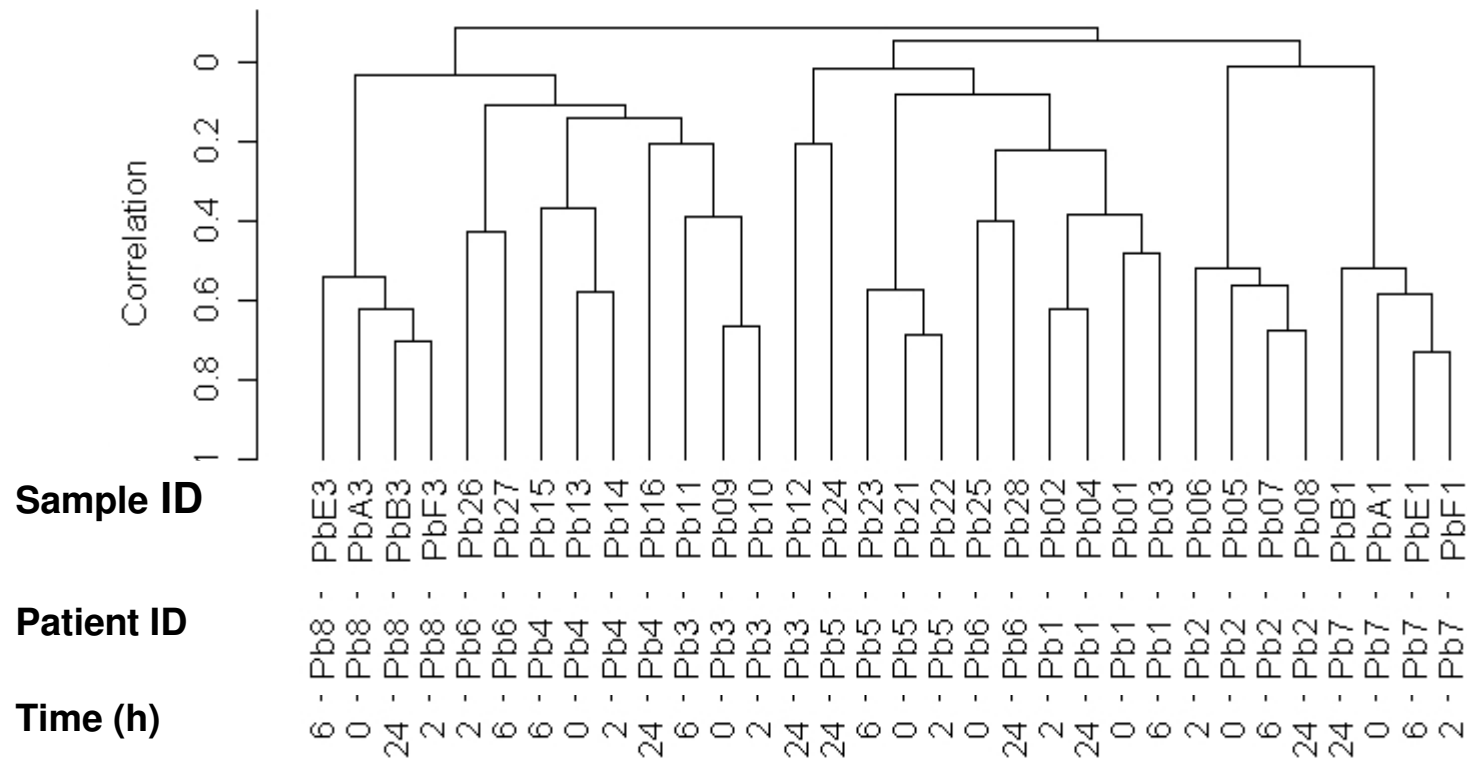

Supplement: MOESM2 [file 9472818]
